# Supplementary material for: Physiological mechanisms contributing to the QTL-combination effects on improved performance of IR64 rice NILs under drought
Source: PubMed Central journal article supplement (PMC4378621; doi:10.1093/jxb/eru506), 2015-02-13
Supplement: supp_eru506_jexbot127175_file001.pdf [file supp_eru506_jexbot127175_file001.pdf]

Henry et al. “Physiological mechanisms contributing to the QTL-combination effects on improved performance of IR64 rice NILs under drought”

**Supplemental Material**

Supp. Table 1. Soil chemical and physical properties in the field and greenhouse experiments.

|                            | Avail. P<br>(mg kg <sup>-1</sup> ) | Exch. K<br>(meq 100g <sup>-1</sup> ) | Exch. Mg<br>(meq 100g <sup>-1</sup> ) | Exch. Ca<br>(meq 100g <sup>-1</sup> ) | Kjeldahl<br>N (%) | pH   | Clay<br>(%) | Sand<br>(%) | Silt (%) |
|----------------------------|------------------------------------|--------------------------------------|---------------------------------------|---------------------------------------|-------------------|------|-------------|-------------|----------|
| Field experiments (season) |                                    |                                      |                                       |                                       |                   |      |             |             |          |
| 2011WS                     | 27                                 | 1.49                                 | 9.7                                   | 17.1                                  | 0.121             | -    | 38          | 21          | 41       |
| 2012DS, 2012WS, 2013WS     | 6.2                                | 38.0                                 | 1.22                                  | 14.0                                  | 0.111             | -    | -           | -           | -        |
| Hazaribag, India           | 12.6                               | 0.93                                 | -                                     | -                                     | -                 | 7.66 | 34          | 30          | 36       |
| 2013DS control             | 10                                 | 1.02                                 | 10.3                                  | 15.4                                  | 0.106             | 6.4  | 42          | 16          | 42       |
| 2013DS stress              | 20                                 | 1.62                                 | 13.0                                  | 19.1                                  | 0.112             | 7.4  | 39          | 18          | 43       |
| Greenhouse experiments     |                                    |                                      |                                       |                                       |                   |      |             |             |          |
| Lpr1                       | 70.7                               | -                                    | -                                     | -                                     | 0.261             | 5.77 | -           | -           | -        |
| Lpr2                       | 38                                 | 1.22                                 | 6.2                                   | 14                                    | 0.111             |      | 34          | 19          | 37       |
| Lpr3                       | 48                                 | 1.32                                 | 7.04                                  | 14.5                                  | 0.108             | 6.2  | 36          | 15          | 49       |
| AdaySel4                   | 42                                 | 1.52                                 | 6.43                                  | 13.1                                  |                   | 6.2  | 35          | 17          | 48       |

Supp. Table 2. Ambient conditions in the field and greenhouse experiments.

|                               | Min. temp<br>(°C) | Max. temp<br>(°C) | Ave. temp<br>(°C) | Ave. RH<br>(%) | Average daily<br>solar radiation<br>(MJ m <sup>-2</sup> ) |
|-------------------------------|-------------------|-------------------|-------------------|----------------|-----------------------------------------------------------|
| Field experiments (season)    |                   |                   |                   |                |                                                           |
| 2011WS                        | 22.2              | 34.7              | 27.7              | 87.3           | 14.0                                                      |
| 2012DS                        | 20.9              | 35.1              | 27.0              | 86.2           | 15.3                                                      |
| 2012WS                        | 21.5              | 35.5              | 27.6              | 89.5           | 13.6                                                      |
| Hazaribag, India <sup>a</sup> | 8.5               | 42.0              | -                 | 74.5           | -                                                         |
| 2013DS                        | 19.9              | 35.8              | 27.1              | 82.6           | 16.3                                                      |
| 2013WS                        | 21.7              | 33.9              | 27.7              | 86.6           | 13.3                                                      |
| Greenhouse experiments        |                   |                   |                   |                |                                                           |
| Lpr1                          | 24.8              | 49                | 31.1              | 71.7           | 15.5 <sup>b</sup>                                         |
| Lpr2                          | 22.6              | 45.6              | 30.0              | 63.1           | 13.7 <sup>b</sup>                                         |
| Lpr3                          | 24.0              | 48.1              | 32.1              | 60.9           | 16.2 <sup>b</sup>                                         |
| AdaySel4                      | 25.2              | 48.5              | 30.8              | 60.4           | 12.0 <sup>b</sup>                                         |

<sup>a</sup>These values were measured outside the rainout shelter.

<sup>b</sup>These values were measured outside the greenhouse.

Supp. Table 3. Plant growth in seedling stage greenhouse studies. Values shown are means  $\pm$  s.e. Values with different letters are significantly different.

| Genotype                | Shoot mass (g) |        |       | Total root length (cm) |        |      | Total water uptake (g) |        |     |
|-------------------------|----------------|--------|-------|------------------------|--------|------|------------------------|--------|-----|
|                         | WW             | DD-75% | DD    | WW                     | DD-75% | DD   | WW                     | DD-75% | DD  |
| <b>A) Lpr1</b>          |                |        |       |                        |        |      |                        |        |     |
| IR77298-14-1-2-B-10 (+) | 0.546          | 0.109  | 0.248 | 1010                   | 637    | 1045 | 201                    | 36.9   | 87  |
| IR77298-14-1-2-B-13 (-) | 0.357          | 0.122  | 0.248 | 837                    | 429    | 1243 | 171                    | 34.2   | 93  |
| IR77298-5-6-B-18 (+)    | 0.522          | 0.079  | 0.308 | 1824                   | 536    | 1743 | 194                    | 36.0   | 104 |
| IR77298-5-6-B-11(-)     | 0.525          | 0.102  | 0.237 | 1252                   | 496    | 1290 | 198                    | 35.9   | 79  |
| IR64                    | 0.452          | 0.086  | 0.273 | 1323                   | 637    | 1487 | 194                    | 36.9   | 91  |
| <b>B) Lpr2</b>          |                |        |       |                        |        |      |                        |        |     |
| IR77298-14-1-2-B-10 (4) | 0.633          | 0.178  |       | 4502 b                 | 1691   |      | 396                    | 115    |     |
| IR87707-445-B-B-B (2)   | 0.655          | 0.200  |       | 4738 a                 | 1542   |      | 397                    | 128    |     |
| IR87707-446-B-B-B (2)   | 0.609          | 0.138  |       | 4635 ab                | 1635   |      | 373                    | 104    |     |
| IR64                    | 0.571          | 0.166  |       | 4528 b                 | 2080   |      | 364                    | 122    |     |
| <b>C) Lpr3</b>          |                |        |       |                        |        |      |                        |        |     |
| IR77298-14-1-2-B-10 (4) | 0.458          | 0.103  |       | 5642                   | 1831   |      | 390                    | 94.1   |     |
| IR87707-445-B-B-B (2)   | 0.410          | 0.078  |       | 5260                   | 1483   |      | 342                    | 85.1   |     |
| IR87707-446-B-B-B (2)   | 0.388          | 0.123  |       | 4831                   | 1673   |      | 351                    | 96.1   |     |
| IR64                    | 0.414          | 0.078  |       | 5296                   | 1788   |      | 387                    | 92.6   |     |
| <b>D) Root anatomy4</b> |                |        |       |                        |        |      |                        |        |     |
| IR77298-14-1-2-B-10 (4) | 0.645 a        | 0.194  |       | -                      | -      |      | 256 a                  | 56.9   |     |
| IR87707-445-B-B-B (2)   | 0.476 c        | 0.133  |       | -                      | -      |      | 181 b                  | 44.4   |     |
| AdaySel                 | 0.526 bc       | 0.165  |       | -                      | -      |      | 234 ab                 | 50.0   |     |
| IR64                    | 0.588 ab       | 0.159  |       | -                      | -      |      | 283 a                  | 49.6   |     |

Supp. Table 4. Root anatomical parameters at the mid-point of nodal roots from the Lpr1 greenhouse experiment.

| <b>Genotype</b>              | <b>Root diameter<br/>(<math>\mu\text{m}</math>)</b> | <b>Stele diameter<br/>(% of root diam)</b> | <b>Metaxylem<br/>vessel<br/>diameter<br/>(<math>\mu\text{m}</math>)</b> | <b>Number of<br/>metaxylem<br/>vessels</b> | <b>% Cortical<br/>Aerenchyma</b> |
|------------------------------|-----------------------------------------------------|--------------------------------------------|-------------------------------------------------------------------------|--------------------------------------------|----------------------------------|
| <b>DD-75% mid-point</b>      |                                                     |                                            |                                                                         |                                            |                                  |
| <b>IR77298-14-1-2-10 (+)</b> | 43.4 ab                                             | 32.9 ab                                    | 3.11 ab                                                                 | 1.31                                       | 22.4                             |
| <b>IR77298-14-1-2-13 (-)</b> | 47.8 ab                                             | 30.5 a                                     | 3.70 a                                                                  | 1.16                                       | 24.2                             |
| <b>IR 77298-5-6-18 (+)</b>   | 27.2 b                                              | 34.3 a                                     | 2.22 b                                                                  | 1.05                                       | 18.8                             |
| <b>IR77298-5-6-11(-)</b>     | 37.3 ab                                             | 32.0 ab                                    | 3.01 ab                                                                 | 1.15                                       | 23.6                             |
| <b>IR 64</b>                 | 51.5 a                                              | 32.1 ab                                    | 3.27 ab                                                                 | 1.31                                       | 23.9                             |
| <b>WW mid-point</b>          |                                                     |                                            |                                                                         |                                            |                                  |
| <b>IR77298-14-1-2-10 (+)</b> | 72.6                                                | 33.0                                       | 3.74 ab                                                                 | 3.72                                       | 43.1                             |
| <b>IR77298-14-1-2-13 (-)</b> | 55.1                                                | 31.5                                       | 3.37 b                                                                  | 3.68                                       | 35.7                             |
| <b>IR 77298-5-6-18 (+)</b>   | 61.5                                                | 32.3                                       | 4.02 a                                                                  | 3.42                                       | 36.7                             |
| <b>IR77298-5-6-11(-)</b>     | 76.0                                                | 33.7                                       | 4.05 a                                                                  | 3.77                                       | 28.4                             |
| <b>IR 64</b>                 | 63.4                                                | 32.7                                       | 3.47 b                                                                  | 3.36                                       | 39.8                             |

Supp. Table 5. Root anatomical parameters from greenhouse experiments at the apical zone (2 cm from the root tip) of 21-day-old seedlings in the drydown from 75% of field capacity (DD-75%) and well-watered (WW) treatments. Values shown are means, and those with different letters are significantly different.

| Genotype                | Root diameter ( $\mu\text{m}$ ) |        | Stele diameter ( $\mu\text{m}$ ) |     | Metaxylem vessel diameter ( $\mu\text{m}$ ) |      | Number of metaxylem vessels |      | % Cortical aerenchyma |        |
|-------------------------|---------------------------------|--------|----------------------------------|-----|---------------------------------------------|------|-----------------------------|------|-----------------------|--------|
|                         | DD-75%                          | WW     | DD-75%                           | WW  | DD-75%                                      | WW   | DD-75%                      | WW   | DD-75%                | WW     |
| <b>Lpr2</b>             |                                 |        |                                  |     |                                             |      |                             |      |                       |        |
| IR77298-14-1-2-B-10 (4) | 349 ab                          | 805    | 123 b                            | 225 | 27.5 b                                      | 39   | 1.33                        | 4.04 | 14.1                  | 13.3   |
| IR87707-445-B-B-B (2)   | 454 a                           | 717    | 156 a                            | 207 | 32.8 a                                      | 37.8 | 1.6                         | 4.03 | 19.8                  | 18.1   |
| IR87707-446-B-B-B (2)   | 374 ab                          | 727    | 143 ab                           | 207 | 31.3 ab                                     | 38.2 | 1.3                         | 4.21 | 17.1                  | 13     |
| IR64                    | 367 b                           | 730    | 125 b                            | 214 | 31.7 ab                                     | 37.4 | 1.03                        | 3.95 | 16.7                  | 10.7   |
| <b>Lpr3</b>             |                                 |        |                                  |     |                                             |      |                             |      |                       |        |
| IR77298-14-1-2-B-10 (4) | 550                             | 784    | 186                              | 189 | 31.8 a                                      | 35.9 | 1.04                        | 4.51 | 19.1                  | 17.8 b |
| IR87707-445-B-B-B (2)   | 553                             | 767    | 173                              | 197 | 27.5 b                                      | 36.8 | 1.02                        | 4.57 | 21.1                  | 17.9 b |
| IR87707-446-B-B-B (2)   | 429                             | 776    | 135                              | 183 | 29.1 ab                                     | 35.1 | 1.13                        | 4.47 | 19.6                  | 16.8 b |
| IR64                    | 503                             | 748    | 166                              | 179 | 27.3 b                                      | 36.5 | 1.22                        | 4.20 | 19.8                  | 21.3 a |
| <b>Root anatomy4</b>    |                                 |        |                                  |     |                                             |      |                             |      |                       |        |
| IR77298-14-1-2-B-10 (4) | 354                             | 678 ab | 121                              | 202 | 32.6                                        | 35.0 | 1.20                        | 3.85 | 18.4                  | 22.5   |
| IR87707-445-B-B-B (2)   | 318                             | 646 b  | 111                              | 194 | 27.8                                        | 34.4 | 1.00                        | 3.96 | 21.8                  | 23.1   |
| AdaySel                 | 338                             | 719 a  | 123                              | 211 | 29.3                                        | 36.7 | 1.20                        | 4.06 | 18.7                  | 24.5   |
| IR64                    | 354                             | 715 a  | 119                              | 208 | 29.5                                        | 36.9 | 1.39                        | 3.66 | 16.3                  | 22.8   |

Supp. Table 6. Root anatomical parameters from the 2012DS field experiment at three soil depths in the stress and well-watered control treatments. Values shown are means, and those with different letters are significantly different.

| Depth (cm) | Genotype          | Whole root diameter ( $\mu\text{m}$ ) |         | Stele diameter ( $\mu\text{m}$ ) |         | Metaxylem vessel diameter ( $\mu\text{m}$ ) |         | Number of metaxylem vessels |         |
|------------|-------------------|---------------------------------------|---------|----------------------------------|---------|---------------------------------------------|---------|-----------------------------|---------|
|            |                   | Stress                                | Control | Stress                           | Control | Stress                                      | Control | Stress                      | Control |
| 15-30      | IR64              | 279                                   | 329     | 68                               | 71      | 14.9                                        | 27.4    | 2.24                        | 3.23    |
|            | IR87707-445-B-B-B | 323                                   | 358     | 77                               | 75      | 15.2                                        | 28.7    | 2.88                        | 3.38    |
|            | IR87707-446-B-B-B | 336                                   | 303     | 80                               | 66      | 15.1                                        | 24.5    | 3.16                        | 3.20    |
| 30-45      | IR64              | 345                                   | 727     | 87                               | 189     | 21.9                                        | 33.9    | 1.28                        | 4.17 a  |
|            | IR87707-445-B-B-B | 391                                   | 597     | 101                              | 152     | 24.9                                        | 25.8    | 1.53                        | 3.43 a  |
|            | IR87707-446-B-B-B | 437                                   | 567     | 104                              | 140     | 26.9                                        | 25.4    | 1.44                        | 2.64 b  |
| 45-60      | IR64              | 397                                   | 568     | 129                              | 149     | 59.7                                        | 57.9    | 1.40                        | 3.24    |
|            | IR87707-445-B-B-B | 557                                   | 582     | 126                              | 140     | 53.0                                        | 56.4    | 2.15                        | 2.92    |
|            | IR87707-446-B-B-B | 621                                   | 609     | 149                              | 166     | 57.9                                        | 70.8    | 2.50                        | 2.61    |

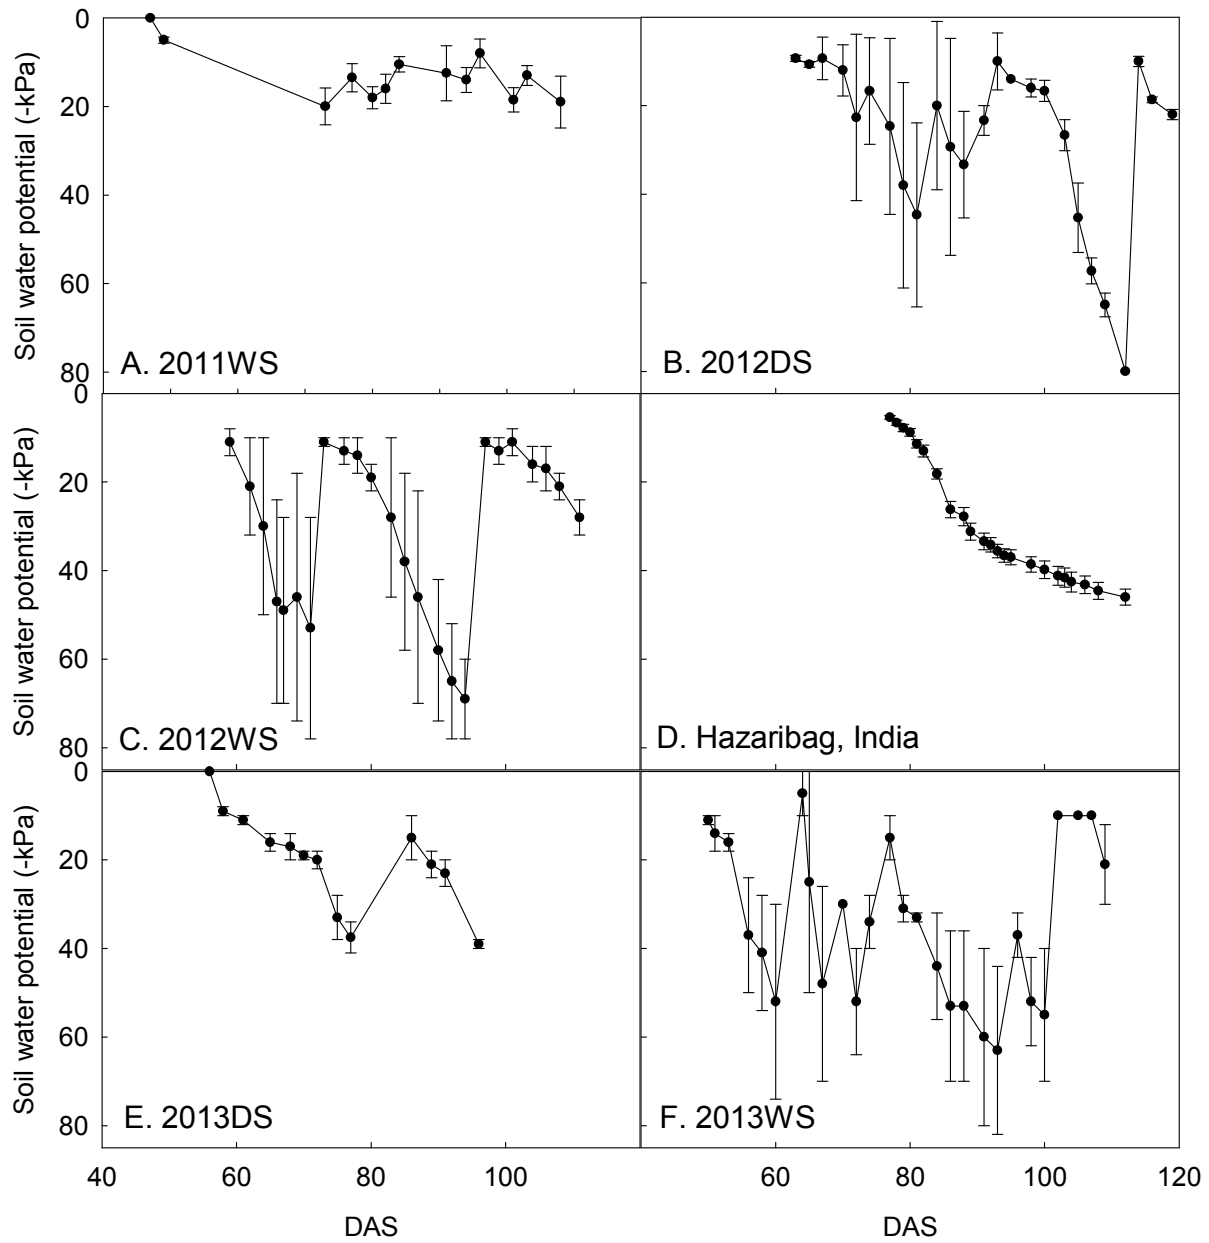

Supp. Fig. 1. Soil water potential at a depth of 30 cm across each of the 6 field drought experiments. Values shown are means of 2-5 tensiometers  $\pm$  se.

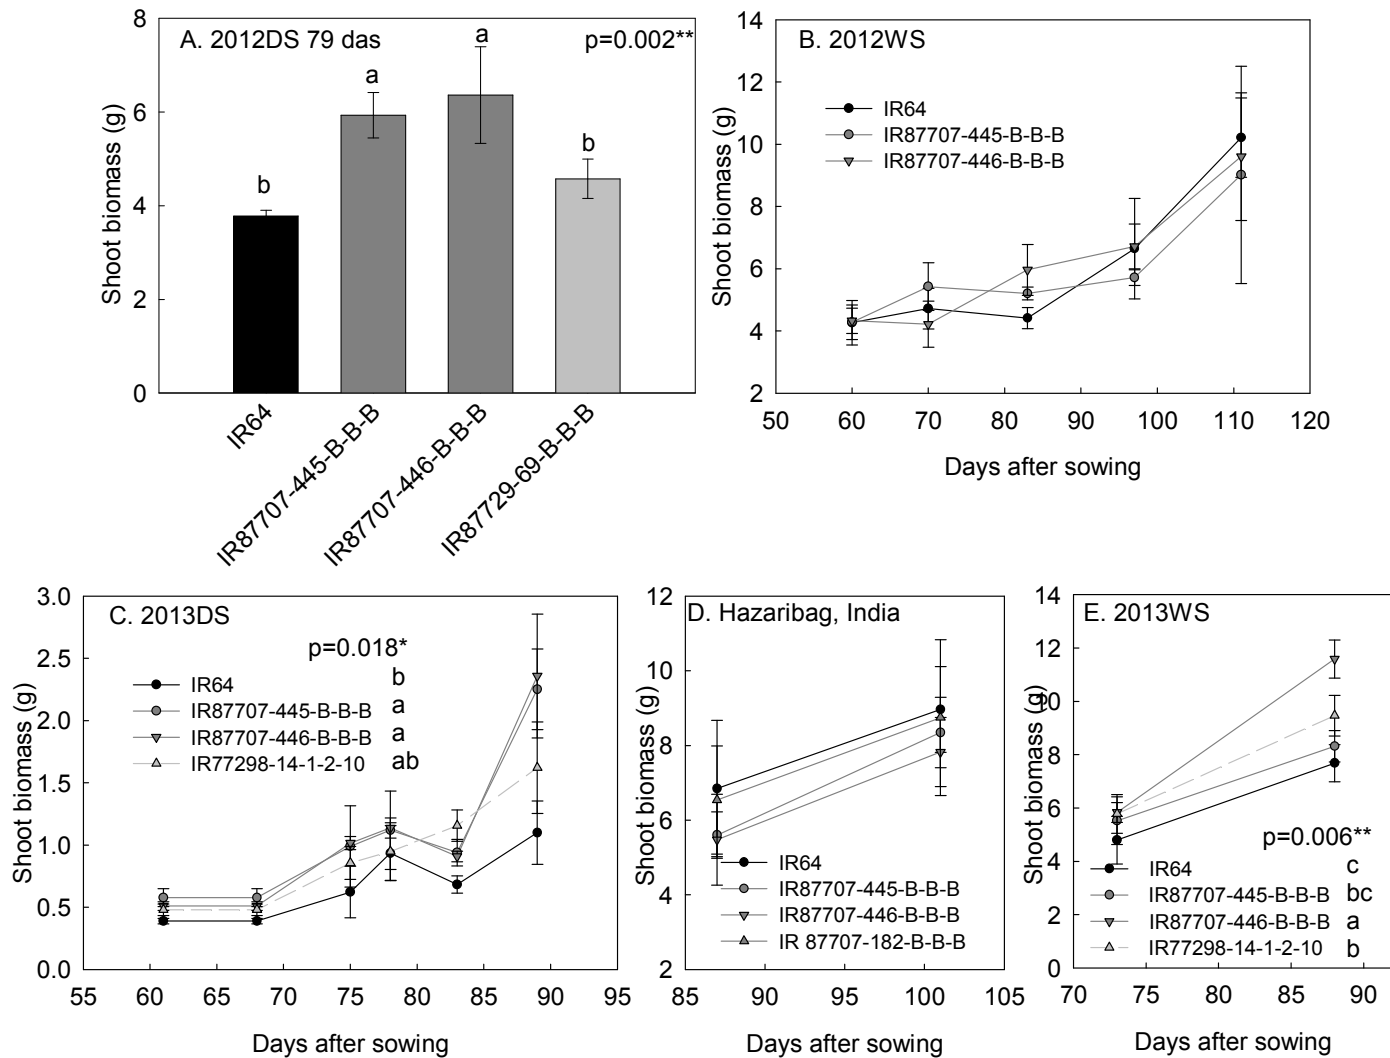

Supp. Fig. 2. Shoot biomass in the drought stress treatments across seasons. P-values shown are for genotypic differences across the experiment as determined by the mixed model ASREML. IR64 is indicated by a black line/bar, and the 2-QTL NILs are indicated by dark gray lines/bars.



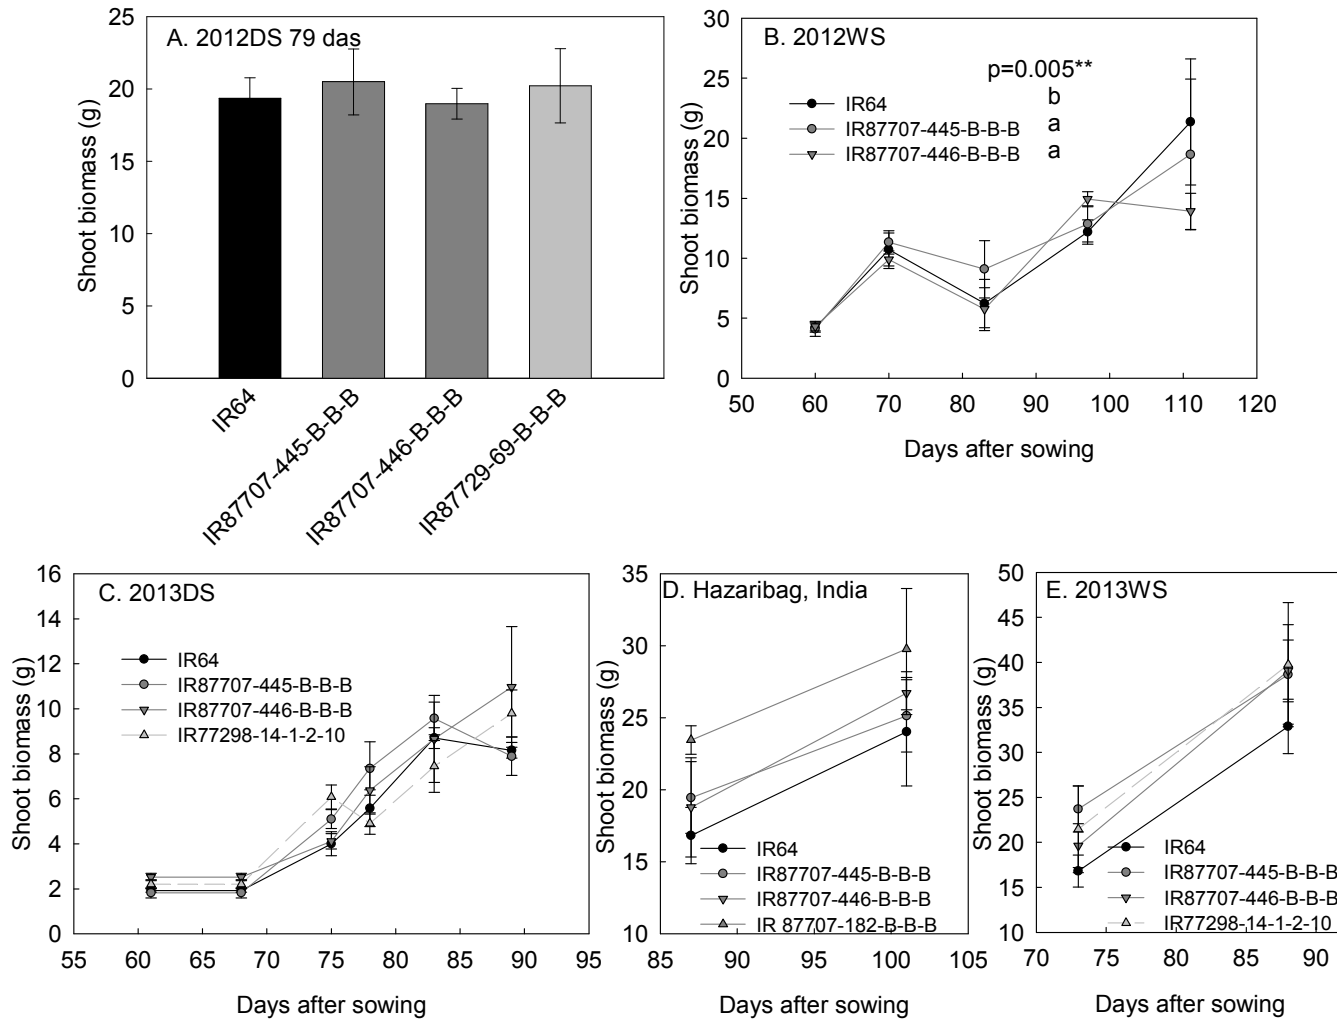

Supp. Fig. 3. Shoot biomass in the well-watered treatments across seasons. Except for 2012WS, no significant differences in shoot biomass were observed among genotypes in the well-watered treatments. IR64 is indicated by a black line/bar, and the 2-QTL NILs are indicated by dark gray lines/bars.

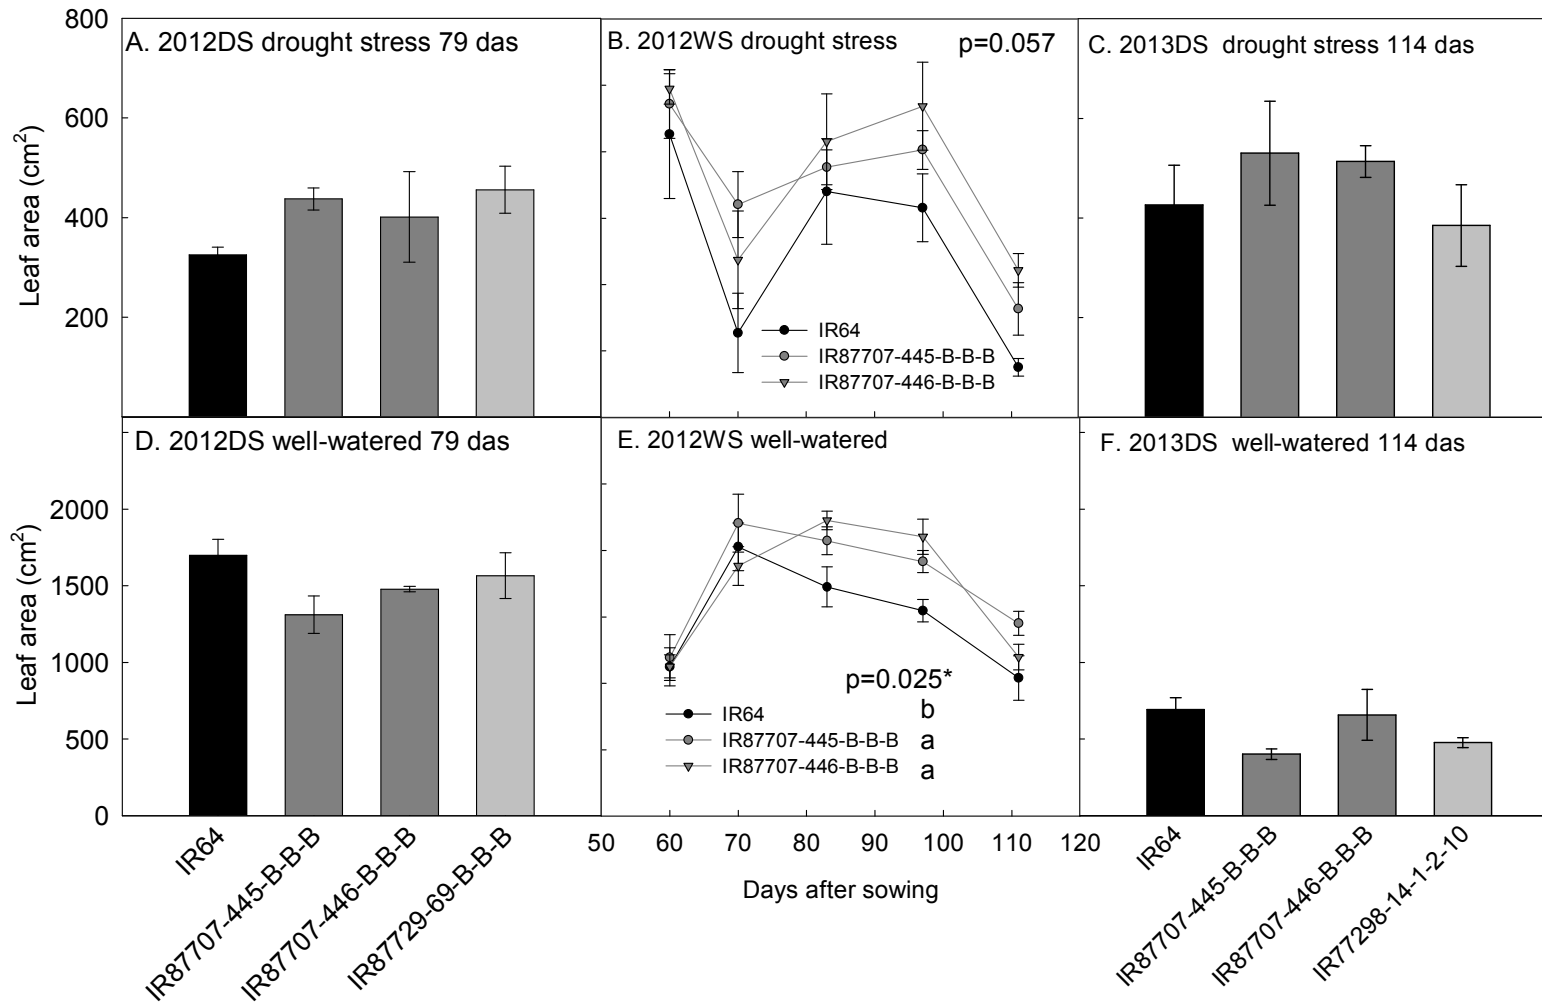

Supp. Fig. 4. Leaf area in the drought (A-C) and well-watered (D-F) treatments across seasons. P-values shown are for genotypic differences across the experiment as determined by the mixed model ASREML. IR64 is indicated by a black line/bar, and the 2-QTL NILs are indicated by dark gray lines/bars.

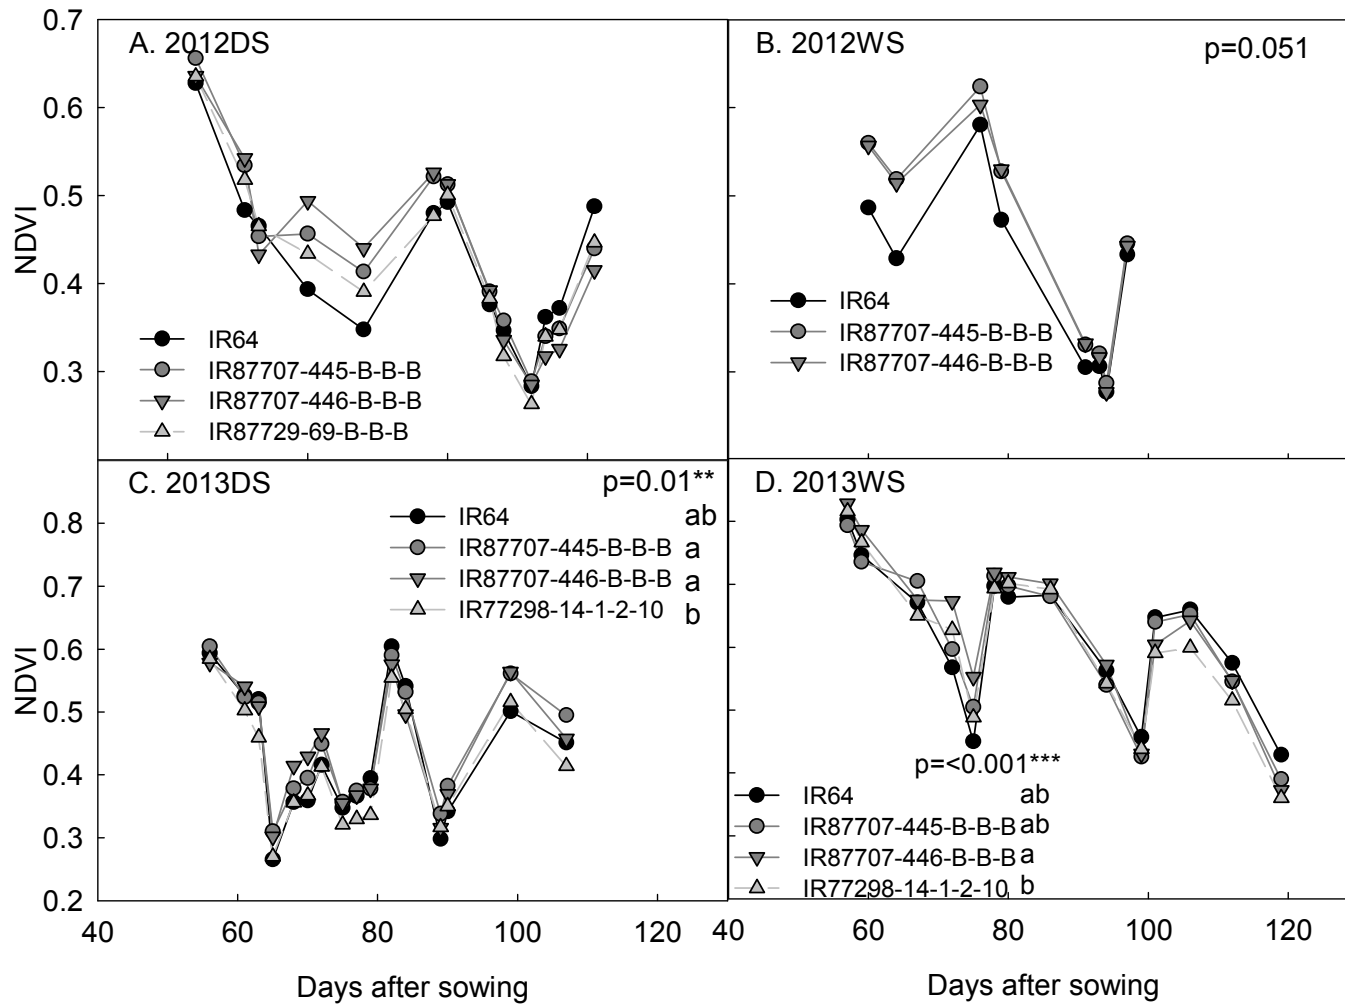

Supp. Fig. 5. Normalized difference vegetation index (NDVI) in the drought treatments across seasons. P-values shown are for genotypic differences across the experiment as determined by the mixed model ASREML. IR64 is indicated by a black line, and the 2-QTL NILs are indicated by dark gray lines.

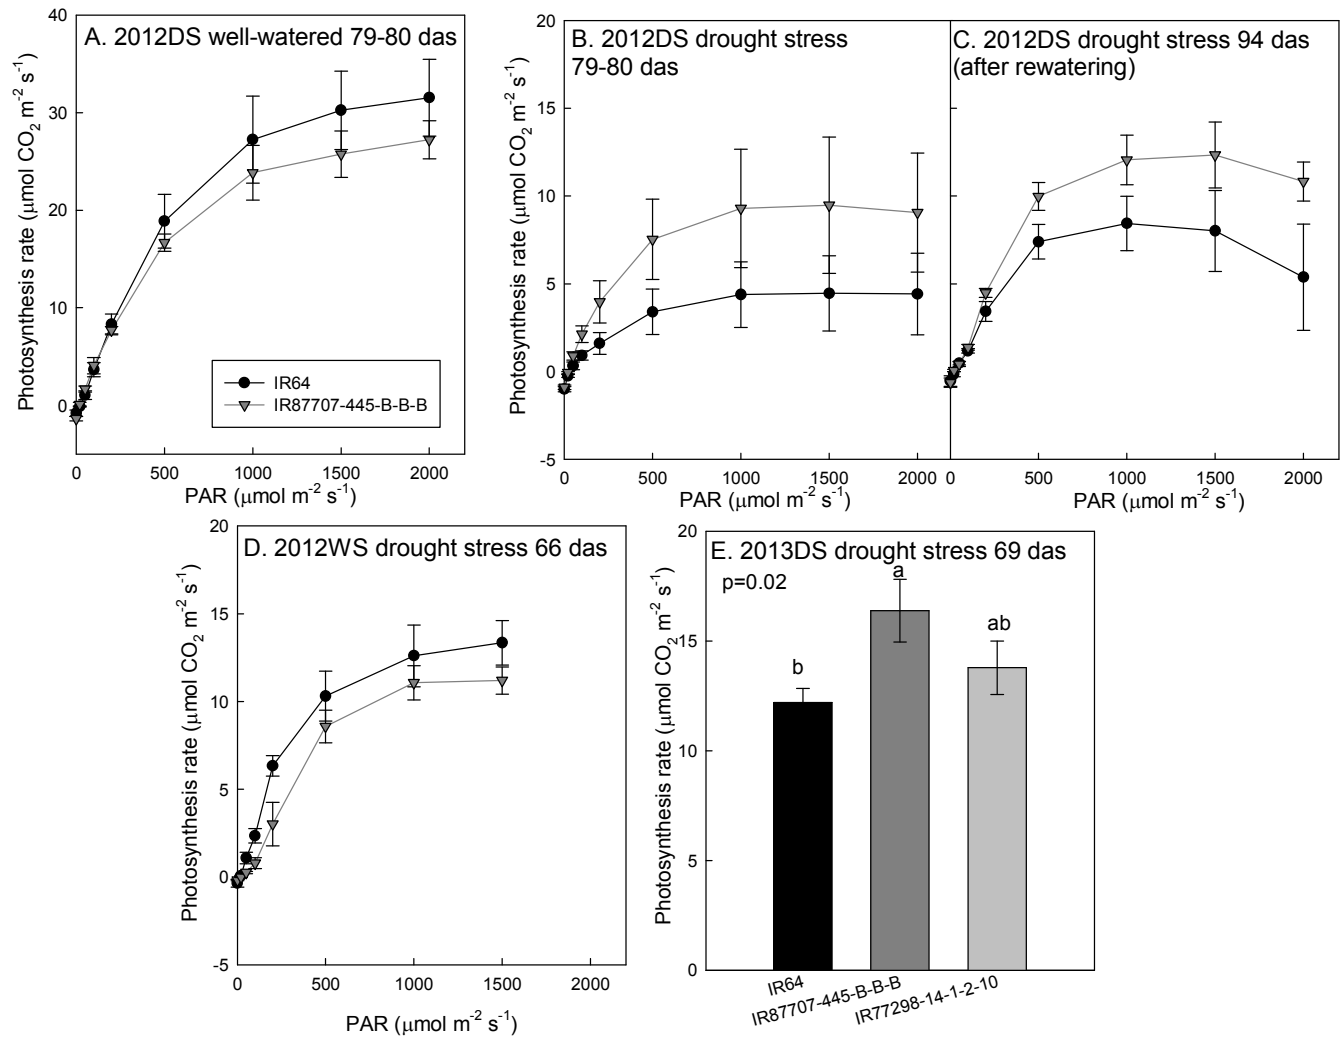

Supp. Fig. 6. Photosynthesis rates on selected dates in 2012 and 2013. Significant differences among genotypes were observed in the 2013DS experiment (E) only. IR64 is indicated by a black line/bar, and the 2-QTL NIL is indicated by dark gray lines/bars.

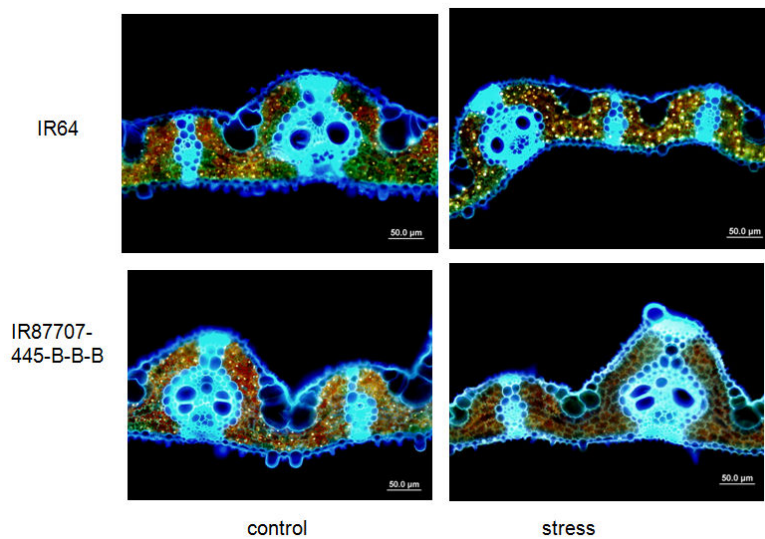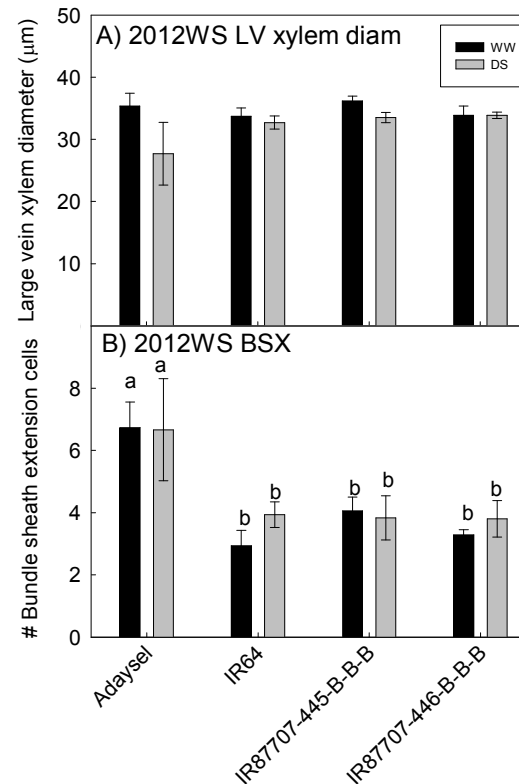

Supp. Fig. 7. Leaf anatomy of IR87707-445-B-B-B and IR64. A) example leaf sections; B) example anatomical parameters in which leaf anatomy was similar among genotypes. The total parameters measured were: MCNO: mesophyll cell number, MCWD: mesophyll cell width, MCTA: mesophyll cell total area, SVWD: small vein width, SVHT: small vein height, SV-LFTH: small vein leaf thickness, IVD-SV: interveinal distance small vein, SV-BSCN: small vein bundle sheath cell number, SV-BSCA: small vein bundle sheath cell area, LVWD: large vein width, LVHT: large vein height, LV-LFTH: large vein leaf thickness, IVD-LV: interveinal distance large vein, LV-BSCN: large vein bundle sheath cell number, LV-BSCA: large vein bundle sheath cell area, #LV xylem number: of large vein xylem vessels, LV xylem diam: large vein xylem vessel diameter, and #BSX: number of bundle sheath extension cells.

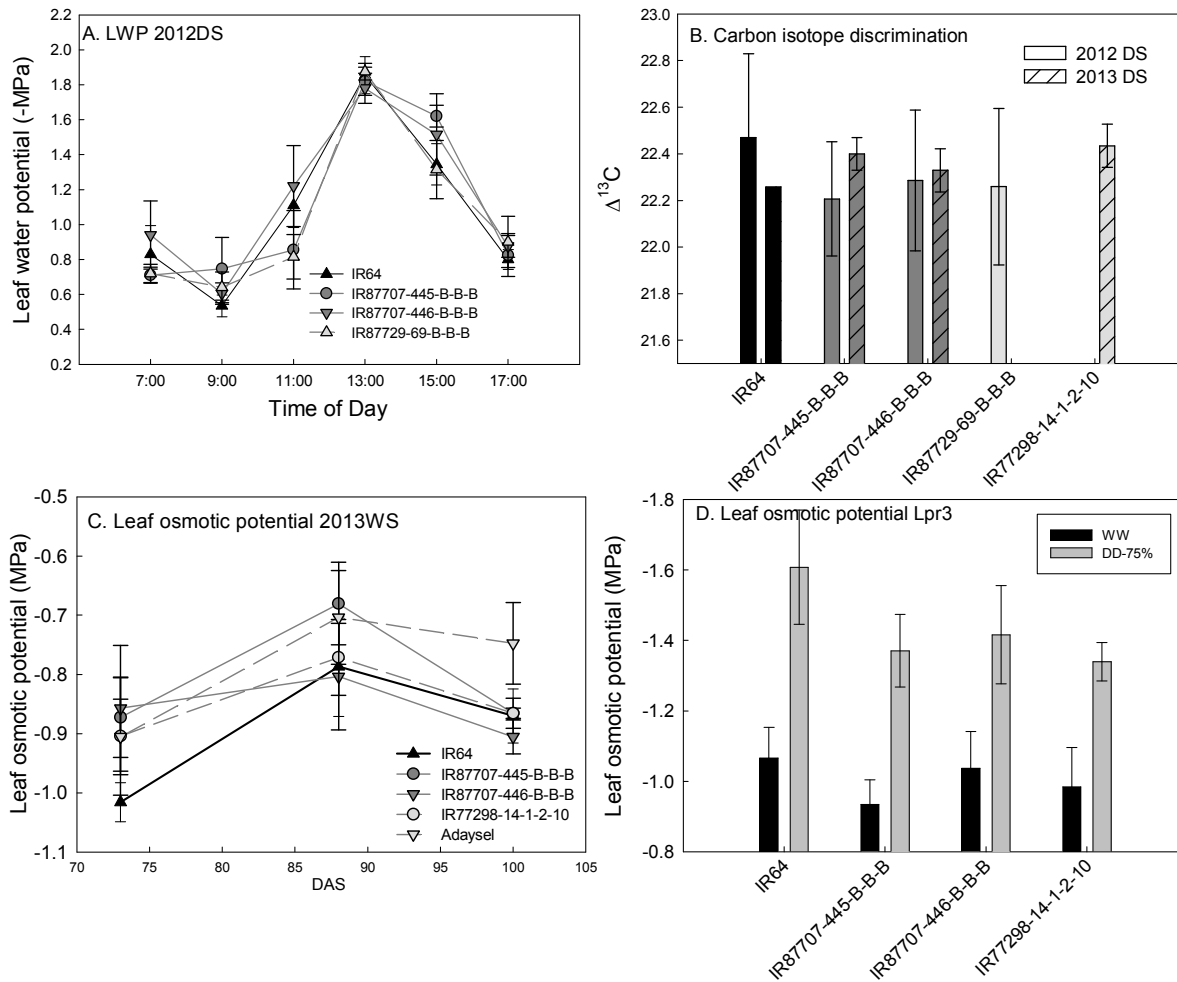

Supp. Fig. 8. Leaf water status in the WW treatment according to A) leaf water potential over the course of the day (88 DAS), B) carbon isotope discrimination (79 DAS in 2012DS, 114 DAS in 2013DS), and C) leaf osmotic potential. D) Leaf osmotic potential in the Lpr3 seedling stage greenhouse study. IR64 is indicated by a black line/bar, and the 2-QTL NILs are indicated by dark gray lines/bars in panels A-C.

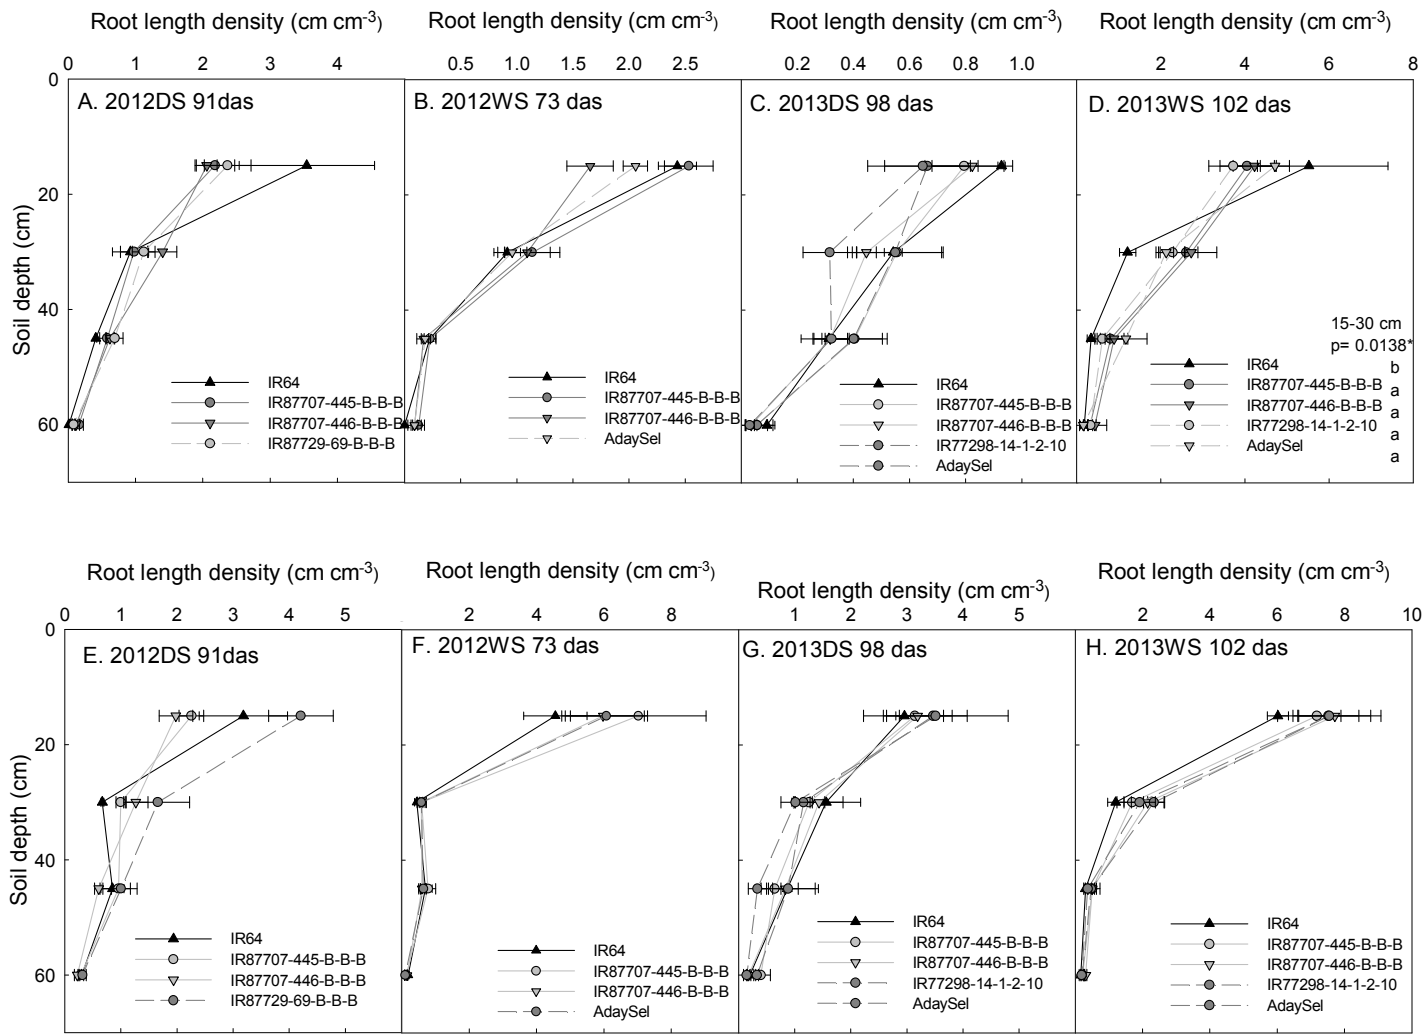

Supp. Fig. 9. Distribution of root length density with depth in the drought stress (A-D) and well-watered (E-H) treatments of the field studies. IR64 is indicated by black lines, and the 2-QTL NILs are indicated by dark gray lines.

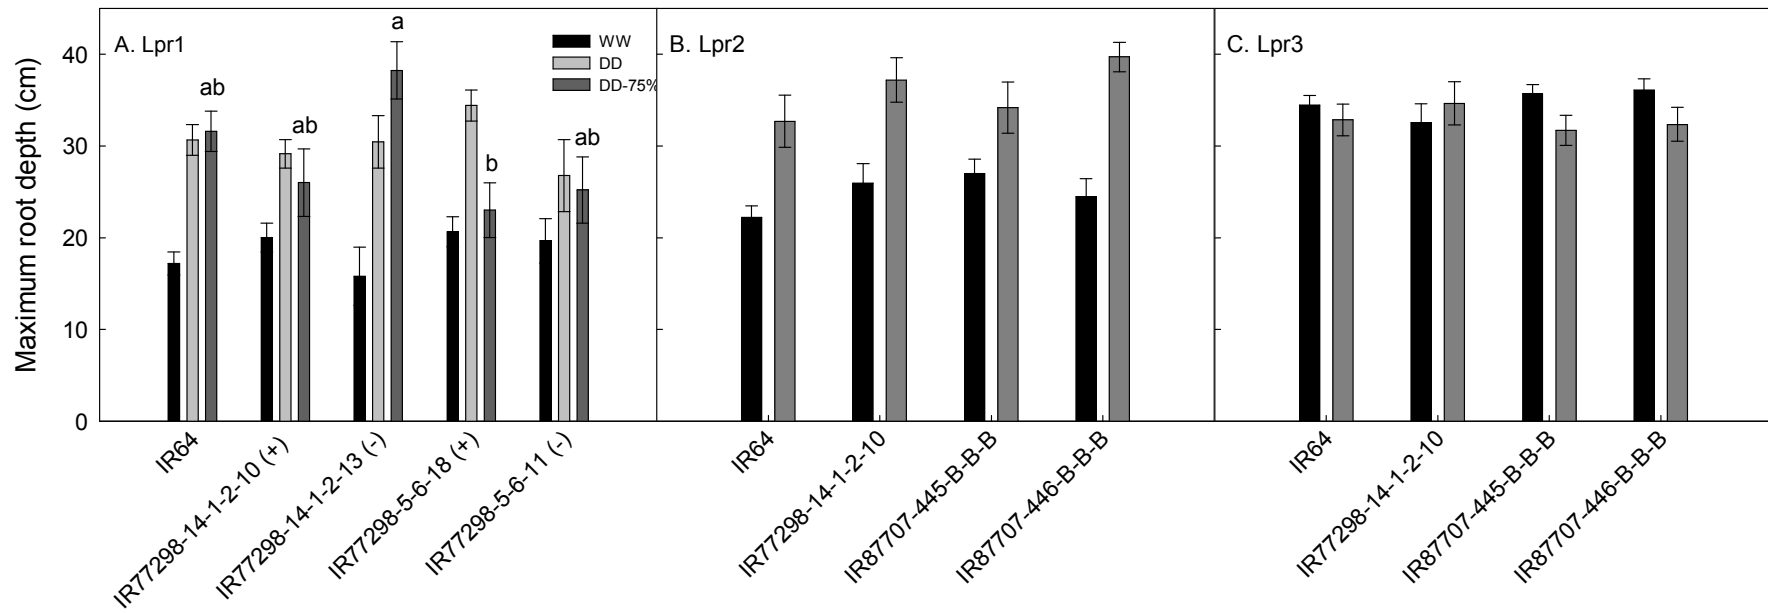

Supp. Fig. 10. Maximum root depth in greenhouse studies (A-C). Values shown are mean  $\pm$  se, and letters indicate significant differences among genotypes as determined by LSD comparison ( $P < 0.05$ ).



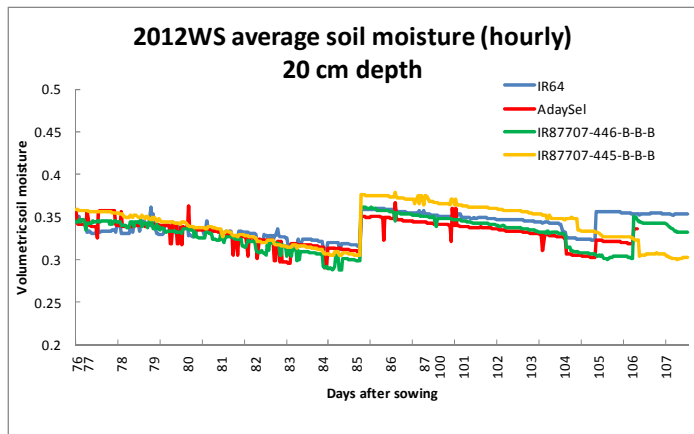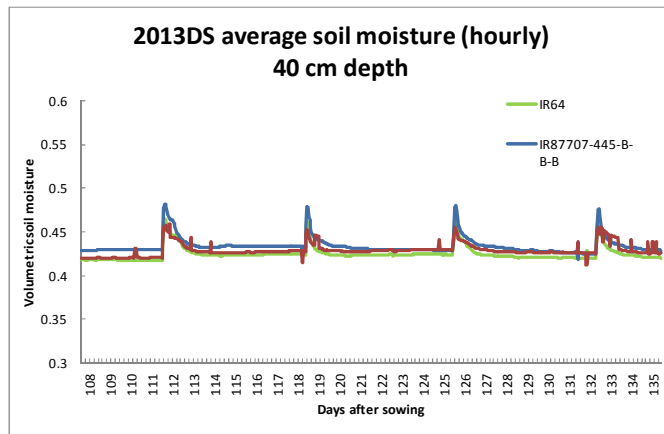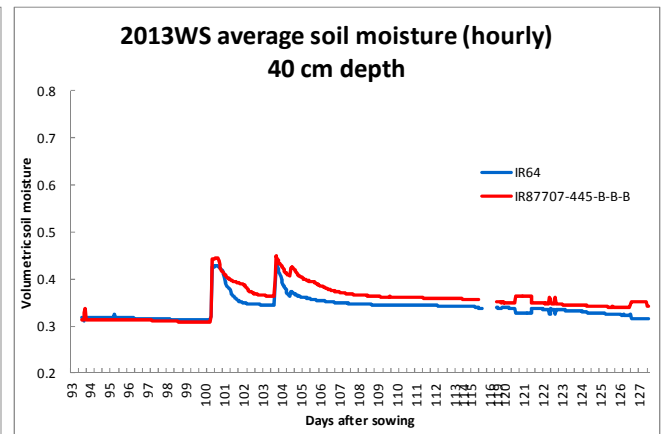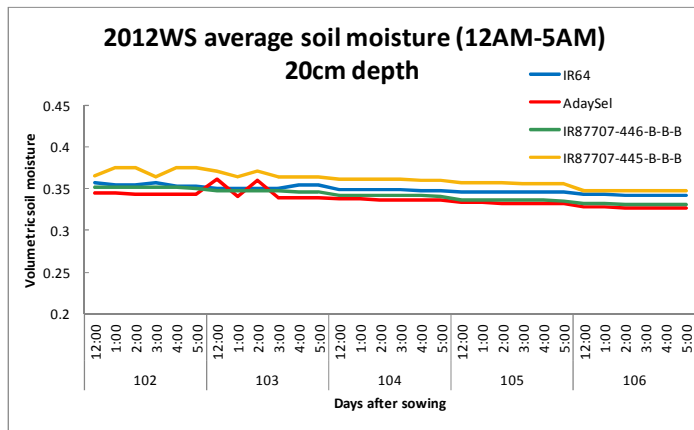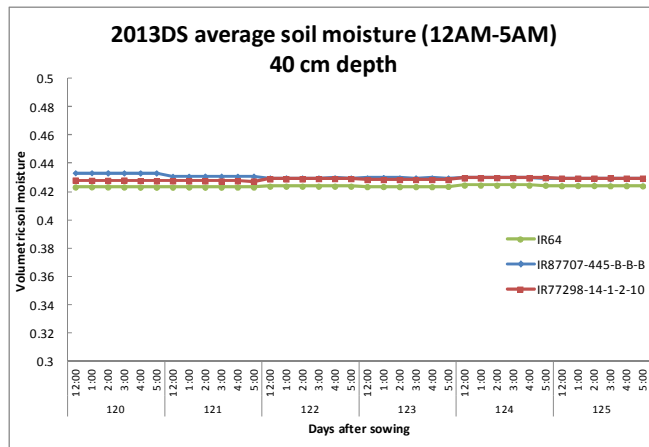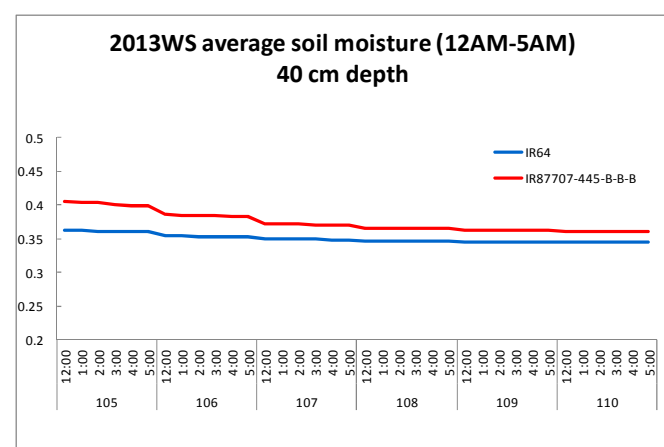

Supp. Fig. 11. Trends in soil moisture across the seasons 2012WS, 2013DS, and 2013WS (A, B, C) and diurnal trends (D, E, F) did not indicate genotypic differences in water uptake or that night-time water loss from roots to the soil was occurring.

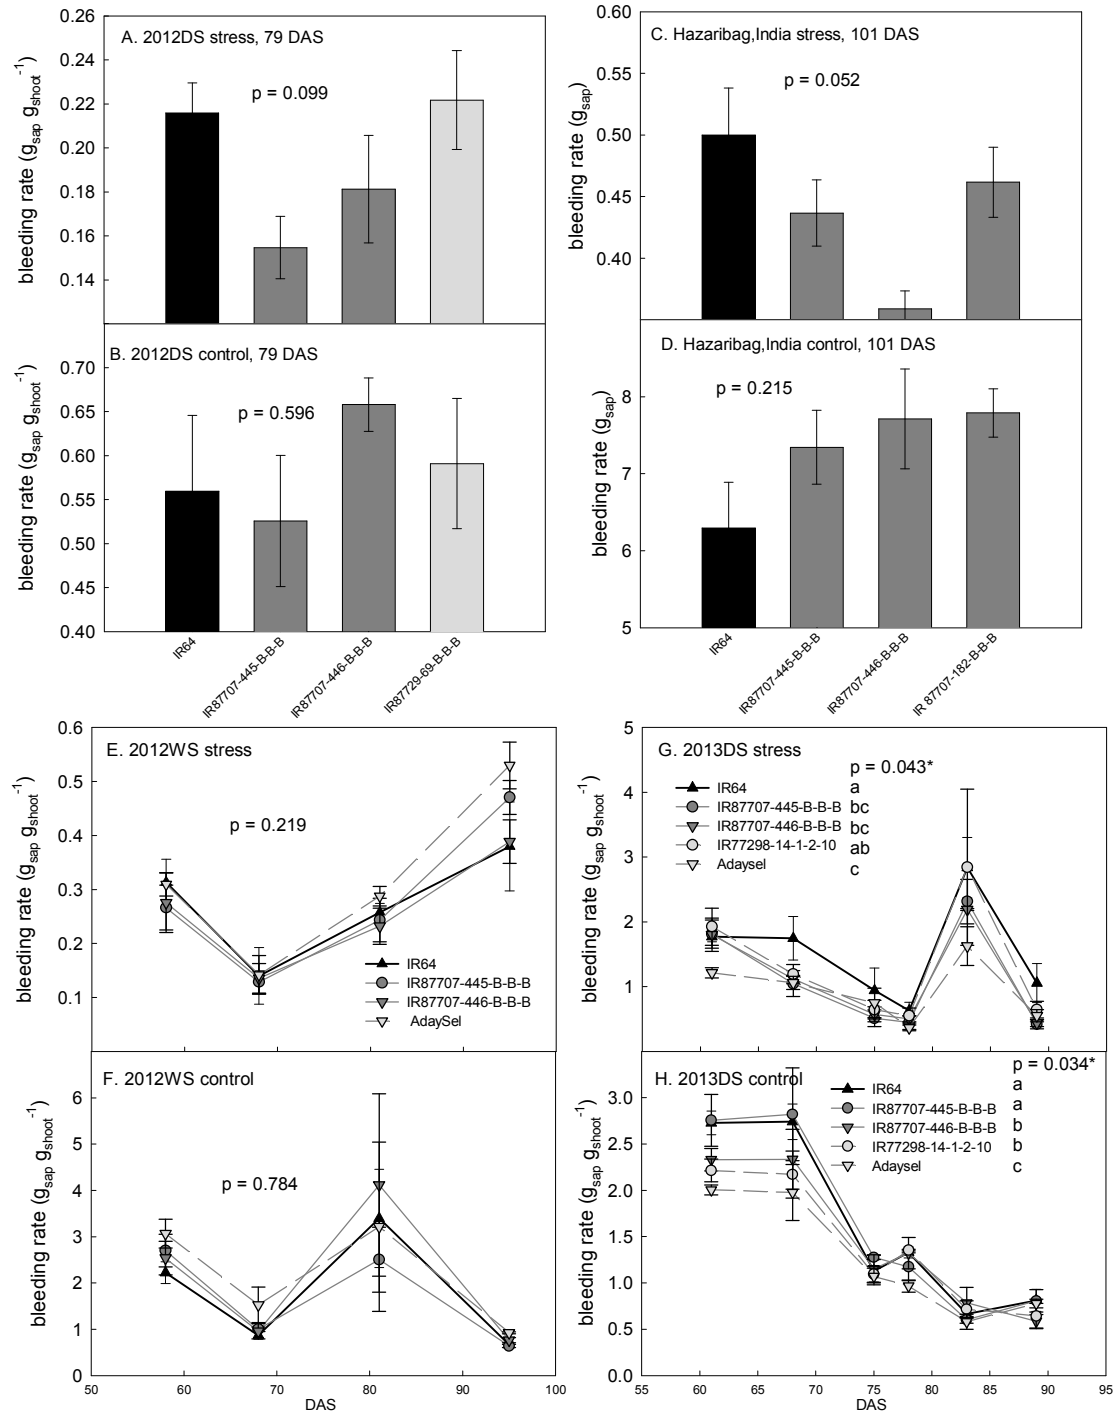

Supp. Fig. 12. Xylem sap bleeding rate over 4 hours from the root zone of IR64 (recipient parent; black), NILs with 2 QTL (*qDTY<sub>2.2</sub>* and *qDTY<sub>4.1</sub>*; dark gray) and + QTL BIL (parent IR77298-14-1-2-10), +4QTL NIL IR87729-69-B-B-B, and donor AdaySel; light gray). Values shown are mean  $\pm$  se, and letters indicate significant differences among genotypes as determined by LSD comparison ( $P < 0.05$ ). P-values shown are for genotypic differences across the experiment as determined by the mixed model ASREML. IR64 is indicated by a black line/bar, and the 2-QTL NILs are indicated by dark gray lines/bars.
